# Supplementary material
Source: PubMed Central journal article supplement (PMC6901294)
Supplement: supp_RA119.010917_155607_2_supp_422186_q08h80.pdf [file supp_RA119.010917_155607_2_supp_422186_q08h80.pdf]

Regulation of Plant ER Oxidoreductin 1 Activity for Efficient Oxidative Protein Folding

**Motonori Matsusaki, Aya Okuda, Koichi Matsuo, Kunihiro Gekko, Taro Masuda,  
Yurika Naruo, Akiho Hirose, Keiichi Kono, Yuichiro Tsuchi, Reiko Urade**

**Table S1**

Second structure contents of recombinant GmERO1a (WT) and its cysteine-mutants. Second structure contents were estimated from the vacuum ultraviolet circular dichroism (VUVCD) spectrum by SERCON3 program. Second structure contents of Human ERO1 $\alpha$  was obtained from PDB # 3AHR.

| Protein             | Second structure contents (%) |                 |      |      | Numbers of               |                          |                          |                          |
|---------------------|-------------------------------|-----------------|------|------|--------------------------|--------------------------|--------------------------|--------------------------|
|                     | $\alpha$ -helix               | $\beta$ -strand | turn | coil | $\alpha$ -helix residues | $\alpha$ -helix segments | $\beta$ -strand residues | $\beta$ -strand segments |
| GmERO1a             |                               |                 |      |      |                          |                          |                          |                          |
| WT                  | 51.1                          | 5.5             | 13.7 | 31.1 | 193.7                    | 20                       | 20.8                     | 4                        |
| C113A               | 52.4                          | 8.2             | 13.5 | 29.8 | 198.6                    | 20                       | 31.1                     | 7                        |
| C118A               | 50.8                          | 7.9             | 13.6 | 30.3 | 192.5                    | 20                       | 29.9                     | 7                        |
| C121A               | 43.8                          | 10.5            | 17.5 | 31.5 | 166.0                    | 17                       | 39.8                     | 9                        |
| C123A               | 43.2                          | 10.0            | 18.9 | 30.2 | 163.7                    | 16                       | 37.9                     | 9                        |
| C146A               | 42.2                          | 10.2            | 17.2 | 31.1 | 159.9                    | 17                       | 38.7                     | 9                        |
| C113/146A           | 50.9                          | 7.9             | 13.4 | 32.0 | 192.9                    | 20                       | 29.9                     | 8                        |
| C121/146A           | 53.1                          | 8.7             | 12.6 | 30.1 | 201.2                    | 20                       | 33.0                     | 7                        |
| C123/146A           | 55.6                          | 3.5             | 15.2 | 29.0 | 210.7                    | 18                       | 13.3                     | 3                        |
| C118/121A           | 50.6                          | 7.3             | 11.9 | 32.7 | 191.8                    | 20                       | 27.7                     | 8                        |
| Human ERO1 $\alpha$ | 48.9                          | 6.4             | 6.9  | -    | 185.3                    | 16                       | 24.3                     | 9                        |

GmERO1a 69 YETVDRLN<sup>EE</sup>VLHPSLQ<sup>EL</sup>VKTP<sup>FFRYFK</sup>VKLW<sup>cDc</sup>PF<sup>FWP</sup>DDG<sup>M</sup>cRLR<sup>Dc</sup>SV<sup>cE</sup>cPENEF<sup>PES</sup>FKKPDRRLSMTDLV<sup>c</sup>QEGK<sup>PQA</sup>AVDRTLDSKAF<sup>RGWT</sup>

C113A 69 YETVDRLN<sup>EE</sup>VLHPSLQ<sup>EL</sup>VKTP<sup>FFRYFK</sup>VKLW<sup>cDc</sup>PF<sup>FWP</sup>DDG<sup>M</sup>cRLR<sup>Dc</sup>SV<sup>cE</sup>cPENEF<sup>PES</sup>FKKPDRRLSMTDLV<sup>c</sup>QEGK<sup>PQA</sup>AVDRTLDSKAF<sup>RGWT</sup>

C118A 69 YETVDRLN<sup>EE</sup>VLHPSLQ<sup>EL</sup>VKTP<sup>FFRYFK</sup>VKLW<sup>cDc</sup>PF<sup>FWP</sup>DDG<sup>M</sup>cRLR<sup>Dc</sup>SV<sup>cE</sup>cPENEF<sup>PES</sup>FKKPDRRLSMTDLV<sup>c</sup>QEGK<sup>PQA</sup>AVDRTLDSKAF<sup>RGWT</sup>

C121A 69 YETVDRLN<sup>EE</sup>VLHPSLQ<sup>EL</sup>VKTP<sup>FFRYFK</sup>VKLW<sup>cDc</sup>PF<sup>FWP</sup>DDG<sup>M</sup>cRLR<sup>Dc</sup>SV<sup>aE</sup>cPENEF<sup>PES</sup>FKKPDRRLSMTDLV<sup>c</sup>QEGK<sup>PQA</sup>AVDRTLDSKAF<sup>RGWT</sup>

C123A 69 YETVDRLN<sup>EE</sup>VLHPSLQ<sup>EL</sup>VKTP<sup>FFRYFK</sup>VKLW<sup>cDc</sup>PF<sup>FWP</sup>DDG<sup>M</sup>cRLR<sup>Dc</sup>SV<sup>cE</sup>cPENEF<sup>PES</sup>FKKPDRRLSMTDLV<sup>c</sup>QEGK<sup>PQA</sup>AVDRTLDSKAF<sup>RGWT</sup>

C146A 69 YETVDRLN<sup>EE</sup>VLHPSLQ<sup>EL</sup>VKTP<sup>FFRYFK</sup>VKLW<sup>cDc</sup>PF<sup>FWP</sup>DDG<sup>M</sup>cRLR<sup>Dc</sup>SV<sup>cE</sup>cPENEF<sup>PES</sup>FKKPDRRLSMTDLV<sup>a</sup>QEGK<sup>PQA</sup>AVDRTLDSKAF<sup>RGWT</sup>

C113/146A 69 YETVDRLN<sup>EE</sup>VLHPSLQ<sup>EL</sup>VKTP<sup>FFRYFK</sup>VKLW<sup>cDc</sup>PF<sup>FWP</sup>DDG<sup>M</sup>cRLR<sup>Dc</sup>SV<sup>cE</sup>cPENEF<sup>PES</sup>FKKPDRRLSMTDLV<sup>a</sup>QEGK<sup>PQA</sup>AVDRTLDSKAF<sup>RGWT</sup>

C121/146A 69 YETVDRLN<sup>EE</sup>VLHPSLQ<sup>EL</sup>VKTP<sup>FFRYFK</sup>VKLW<sup>cDc</sup>PF<sup>FWP</sup>DDG<sup>M</sup>cRLR<sup>Dc</sup>SV<sup>aE</sup>cPENEF<sup>PES</sup>FKKPDRRLSMTDLV<sup>a</sup>QEGK<sup>PQA</sup>AVDRTLDSKAF<sup>RGWT</sup>

C123/146A 69 YETVDRLN<sup>EE</sup>VLHPSLQ<sup>EL</sup>VKTP<sup>FFRYFK</sup>VKLW<sup>cDc</sup>PF<sup>FWP</sup>DDG<sup>M</sup>cRLR<sup>Dc</sup>SV<sup>cE</sup>cPENEF<sup>PES</sup>FKKPDRRLSMTDLV<sup>c</sup>QEGK<sup>PQA</sup>AVDRTLDSKAF<sup>RGWT</sup>

C118/121A 69 YETVDRLN<sup>EE</sup>VLHPSLQ<sup>EL</sup>VKTP<sup>FFRYFK</sup>VKLW<sup>cDc</sup>PF<sup>FWP</sup>DDG<sup>M</sup>cRLR<sup>Dc</sup>SV<sup>aE</sup>cPENEF<sup>PES</sup>FKKPDRRLSMTDLV<sup>c</sup>QEGK<sup>PQA</sup>AVDRTLDSKAF<sup>RGWT</sup>

  

GmERO1a EIDNPWTND<sup>DE</sup>TDNDEMTYVNLQ<sup>LN</sup>PERYTG<sup>YT</sup>GPSARRIWD<sup>AV</sup>YSEN<sup>c</sup>PKYPSQEL<sup>c</sup>QEEKILYKLI<sup>SL</sup>GHSSISIH<sup>IAS</sup>DYLL<sup>EE</sup>ATNLWGQNL<sup>TLMY</sup>

C113A EIDNPWTND<sup>DE</sup>TDNDEMTYVNLQ<sup>LN</sup>PERYTG<sup>YT</sup>GPSARRIWD<sup>AV</sup>YSEN<sup>c</sup>PKYPSQEL<sup>c</sup>QEEKILYKLI<sup>SL</sup>GHSSISIH<sup>IAS</sup>DYLL<sup>EE</sup>ATNLWGQNL<sup>TLMY</sup>

C118A EIDNPWTND<sup>DE</sup>TDNDEMTYVNLQ<sup>LN</sup>PERYTG<sup>YT</sup>GPSARRIWD<sup>AV</sup>YSEN<sup>c</sup>PKYPSQEL<sup>c</sup>QEEKILYKLI<sup>SL</sup>GHSSISIH<sup>IAS</sup>DYLL<sup>EE</sup>ATNLWGQNL<sup>TLMY</sup>

C121A EIDNPWTND<sup>DE</sup>TDNDEMTYVNLQ<sup>LN</sup>PERYTG<sup>YT</sup>GPSARRIWD<sup>AV</sup>YSEN<sup>c</sup>PKYPSQEL<sup>c</sup>QEEKILYKLI<sup>SL</sup>GHSSISIH<sup>IAS</sup>DYLL<sup>EE</sup>ATNLWGQNL<sup>TLMY</sup>

C123A EIDNPWTND<sup>DE</sup>TDNDEMTYVNLQ<sup>LN</sup>PERYTG<sup>YT</sup>GPSARRIWD<sup>AV</sup>YSEN<sup>c</sup>PKYPSQEL<sup>c</sup>QEEKILYKLI<sup>SL</sup>GHSSISIH<sup>IAS</sup>DYLL<sup>EE</sup>ATNLWGQNL<sup>TLMY</sup>

C146A EIDNPWTND<sup>DE</sup>TDNDEMTYVNLQ<sup>LN</sup>PERYTG<sup>YT</sup>GPSARRIWD<sup>AV</sup>YSEN<sup>c</sup>PKYPSQEL<sup>c</sup>QEEKILYKLI<sup>SL</sup>GHSSISIH<sup>IAS</sup>DYLL<sup>EE</sup>ATNLWGQNL<sup>TLMY</sup>

C113/146A EIDNPWTND<sup>DE</sup>TDNDEMTYVNLQ<sup>LN</sup>PERYTG<sup>YT</sup>GPSARRIWD<sup>AV</sup>YSEN<sup>c</sup>PKYPSQEL<sup>c</sup>QEEKILYKLI<sup>SL</sup>GHSSISIH<sup>IAS</sup>DYLL<sup>EE</sup>ATNLWGQNL<sup>TLMY</sup>

C121/146A EIDNPWTND<sup>DE</sup>TDNDEMTYVNLQ<sup>LN</sup>PERYTG<sup>YT</sup>GPSARRIWD<sup>AV</sup>YSEN<sup>c</sup>PKYPSQEL<sup>c</sup>QEEKILYKLI<sup>SL</sup>GHSSISIH<sup>IAS</sup>DYLL<sup>EE</sup>ATNLWGQNL<sup>TLMY</sup>

C123/146A EIDNPWTND<sup>DE</sup>TDNDEMTYVNLQ<sup>LN</sup>PERYTG<sup>YT</sup>GPSARRIWD<sup>AV</sup>YSEN<sup>c</sup>PKYPSQEL<sup>c</sup>QEEKILYKLI<sup>SL</sup>GHSSISIH<sup>IAS</sup>DYLL<sup>EE</sup>ATNLWGQNL<sup>TLMY</sup>

C118/121A EIDNPWTND<sup>DE</sup>TDNDEMTYVNLQ<sup>LN</sup>PERYTG<sup>YT</sup>GPSARRIWD<sup>AV</sup>YSEN<sup>c</sup>PKYPSQEL<sup>c</sup>QEEKILYKLI<sup>SL</sup>GHSSISIH<sup>IAS</sup>DYLL<sup>EE</sup>ATNLWGQNL<sup>TLMY</sup>

  

GmERO1a DRVLRYPDR<sup>VR</sup>NLYFTFLFV<sup>LRA</sup>VTKASDYLEQ<sup>AE</sup>YDTGNPN<sup>ED</sup>LTQSLIK<sup>QL</sup>LYNPKLQAA<sup>c</sup>PIPF<sup>DE</sup>ANLWKGQSG<sup>PE</sup>LKQKIQQ<sup>Q</sup>FRNISALM<sup>Dc</sup>v

C113A DRVLRYPDR<sup>VR</sup>NLYFTFLFV<sup>LRA</sup>VTKASDYLEQ<sup>AE</sup>YDTGNPN<sup>ED</sup>LTQSLIK<sup>QL</sup>LYNPKLQAA<sup>c</sup>PIPF<sup>DE</sup>ANLWKGQSG<sup>PE</sup>LKQKIQQ<sup>Q</sup>FRNISALM<sup>Dc</sup>v

C118A DRVLRYPDR<sup>VR</sup>NLYFTFLFV<sup>LRA</sup>VTKASDYLEQ<sup>AE</sup>YDTGNPN<sup>ED</sup>LTQSLIK<sup>QL</sup>LYNPKLQAA<sup>c</sup>PIPF<sup>DE</sup>ANLWKGQSG<sup>PE</sup>LKQKIQQ<sup>Q</sup>FRNISALM<sup>Dc</sup>v

C121A DRVLRYPDR<sup>VR</sup>NLYFTFLFV<sup>LRA</sup>VTKASDYLEQ<sup>AE</sup>YDTGNPN<sup>ED</sup>LTQSLIK<sup>QL</sup>LYNPKLQAA<sup>c</sup>PIPF<sup>DE</sup>ANLWKGQSG<sup>PE</sup>LKQKIQQ<sup>Q</sup>FRNISALM<sup>Dc</sup>v

C123A DRVLRYPDR<sup>VR</sup>NLYFTFLFV<sup>LRA</sup>VTKASDYLEQ<sup>AE</sup>YDTGNPN<sup>ED</sup>LTQSLIK<sup>QL</sup>LYNPKLQAA<sup>c</sup>PIPF<sup>DE</sup>ANLWKGQSG<sup>PE</sup>LKQKIQQ<sup>Q</sup>FRNISALM<sup>Dc</sup>v

C146A DRVLRYPDR<sup>VR</sup>NLYFTFLFV<sup>LRA</sup>VTKASDYLEQ<sup>AE</sup>YDTGNPN<sup>ED</sup>LTQSLIK<sup>QL</sup>LYNPKLQAA<sup>c</sup>PIPF<sup>DE</sup>ANLWKGQSG<sup>PE</sup>LKQKIQQ<sup>Q</sup>FRNISALM<sup>Dc</sup>v

C113/146A DRVLRYPDR<sup>VR</sup>NLYFTFLFV<sup>LRA</sup>VTKASDYLEQ<sup>AE</sup>YDTGNPN<sup>ED</sup>LTQSLIK<sup>QL</sup>LYNPKLQAA<sup>c</sup>PIPF<sup>DE</sup>ANLWKGQSG<sup>PE</sup>LKQKIQQ<sup>Q</sup>FRNISALM<sup>Dc</sup>v

C121/146A DRVLRYPDR<sup>VR</sup>NLYFTFLFV<sup>LRA</sup>VTKASDYLEQ<sup>AE</sup>YDTGNPN<sup>ED</sup>LTQSLIK<sup>QL</sup>LYNPKLQAA<sup>c</sup>PIPF<sup>DE</sup>ANLWKGQSG<sup>PE</sup>LKQKIQQ<sup>Q</sup>FRNISALM<sup>Dc</sup>v

C123/146A DRVLRYPDR<sup>VR</sup>NLYFTFLFV<sup>LRA</sup>VTKASDYLEQ<sup>AE</sup>YDTGNPN<sup>ED</sup>LTQSLIK<sup>QL</sup>LYNPKLQAA<sup>c</sup>PIPF<sup>DE</sup>ANLWKGQSG<sup>PE</sup>LKQKIQQ<sup>Q</sup>FRNISALM<sup>Dc</sup>v

C118/121A DRVLRYPDR<sup>VR</sup>NLYFTFLFV<sup>LRA</sup>VTKASDYLEQ<sup>AE</sup>YDTGNPN<sup>ED</sup>LTQSLIK<sup>QL</sup>LYNPKLQAA<sup>c</sup>PIPF<sup>DE</sup>ANLWKGQSG<sup>PE</sup>LKQKIQQ<sup>Q</sup>FRNISALM<sup>Dc</sup>v

  

GmERO1a GcEK<sup>c</sup>RLWGKLV<sup>GL</sup>GLGTALKIL<sup>FS</sup>V<sup>DG</sup>QENSSHTL<sup>QL</sup>QRNEVIAL<sup>TN</sup>LLNRLSES<sup>VK</sup>FFVHEV<sup>GPTA</sup>ERIM<sup>EGG</sup> 442

C113A GcEK<sup>c</sup>RLWGKLV<sup>GL</sup>GLGTALKIL<sup>FS</sup>V<sup>DG</sup>QENSSHTL<sup>QL</sup>QRNEVIAL<sup>TN</sup>LLNRLSES<sup>VK</sup>FFVHEV<sup>GPTA</sup>ERIM<sup>EGG</sup> 442

C118A GcEK<sup>c</sup>RLWGKLV<sup>GL</sup>GLGTALKIL<sup>FS</sup>V<sup>DG</sup>QENSSHTL<sup>QL</sup>QRNEVIAL<sup>TN</sup>LLNRLSES<sup>VK</sup>FFVHEV<sup>GPTA</sup>ERIM<sup>EGG</sup> 442

C121A GcEK<sup>c</sup>RLWGKLV<sup>GL</sup>GLGTALKIL<sup>FS</sup>V<sup>DG</sup>QENSSHTL<sup>QL</sup>QRNEVIAL<sup>TN</sup>LLNRLSES<sup>VK</sup>FFVHEV<sup>GPTA</sup>ERIM<sup>EGG</sup> 442

C123A GcEK<sup>c</sup>RLWGKLV<sup>GL</sup>GLGTALKIL<sup>FS</sup>V<sup>DG</sup>QENSSHTL<sup>QL</sup>QRNEVIAL<sup>TN</sup>LLNRLSES<sup>VK</sup>FFVHEV<sup>GPTA</sup>ERIM<sup>EGG</sup> 442

C146A GcEK<sup>c</sup>RLWGKLV<sup>GL</sup>GLGTALKIL<sup>FS</sup>V<sup>DG</sup>QENSSHTL<sup>QL</sup>QRNEVIAL<sup>TN</sup>LLNRLSES<sup>VK</sup>FFVHEV<sup>GPTA</sup>ERIM<sup>EGG</sup> 442

C113/146A GcEK<sup>c</sup>RLWGKLV<sup>GL</sup>GLGTALKIL<sup>FS</sup>V<sup>DG</sup>QENSSHTL<sup>QL</sup>QRNEVIAL<sup>TN</sup>LLNRLSES<sup>VK</sup>FFVHEV<sup>GPTA</sup>ERIM<sup>EGG</sup> 442

C121/146A GcEK<sup>c</sup>RLWGKLV<sup>GL</sup>GLGTALKIL<sup>FS</sup>V<sup>DG</sup>QENSSHTL<sup>QL</sup>QRNEVIAL<sup>TN</sup>LLNRLSES<sup>VK</sup>FFVHEV<sup>GPTA</sup>ERIM<sup>EGG</sup> 442

C123/146A GcEK<sup>c</sup>RLWGKLV<sup>GL</sup>GLGTALKIL<sup>FS</sup>V<sup>DG</sup>QENSSHTL<sup>QL</sup>QRNEVIAL<sup>TN</sup>LLNRLSES<sup>VK</sup>FFVHEV<sup>GPTA</sup>ERIM<sup>EGG</sup> 442

C118/121A GcEK<sup>c</sup>RLWGKLV<sup>GL</sup>GLGTALKIL<sup>FS</sup>V<sup>DG</sup>QENSSHTL<sup>QL</sup>QRNEVIAL<sup>TN</sup>LLNRLSES<sup>VK</sup>FFVHEV<sup>GPTA</sup>ERIM<sup>EGG</sup> 442

**Figure S1. Alignment of amino acid sequences of wild type GmERO1a and its cysteine-mutants.** Second structures of GmERO1a and its cysteine-mutants were predicted from VUVCD spectrum. Purple, light blue and black amino acid residues in the amino acid sequences are included in helix,  $\beta$  structures and turn or coil, respectively.

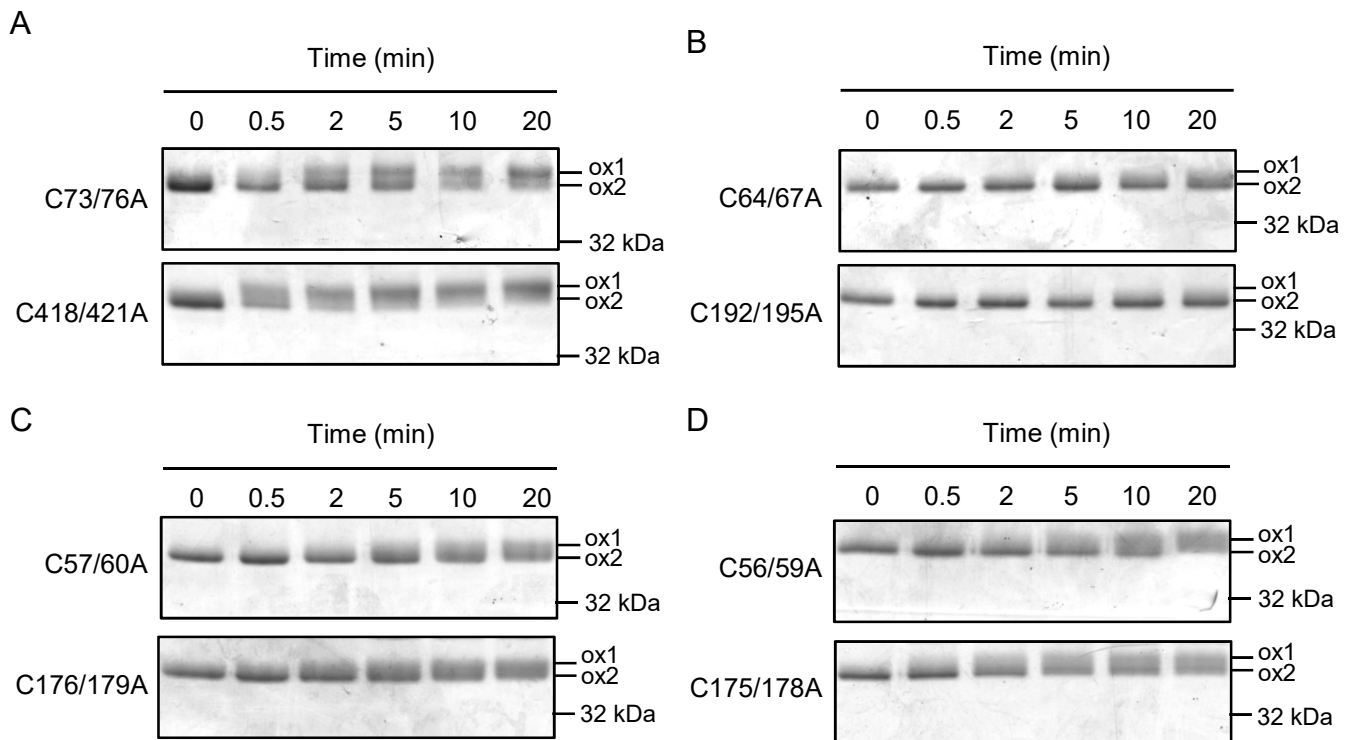

**Figure S2. Conversion of ox-2 GmERO1a to the ox-1 form by reduced active center mutant of PDI family proteins.** GmERO1a (5  $\mu$ M) was incubated with 2  $\mu$ M reduced cysteine-mutants of GmPDIL-1 (A), GmPDIM (B), GmPDIS-1 (C) or GmPDIS-2 (D) in the presence of 10 mM GSH at 25 $^{\circ}$  C, then treated with N-ethylmaleimide and subjected to non-reducing SDS-PAGE. Proteins were stained with Coomassie Brilliant Blue G-250.

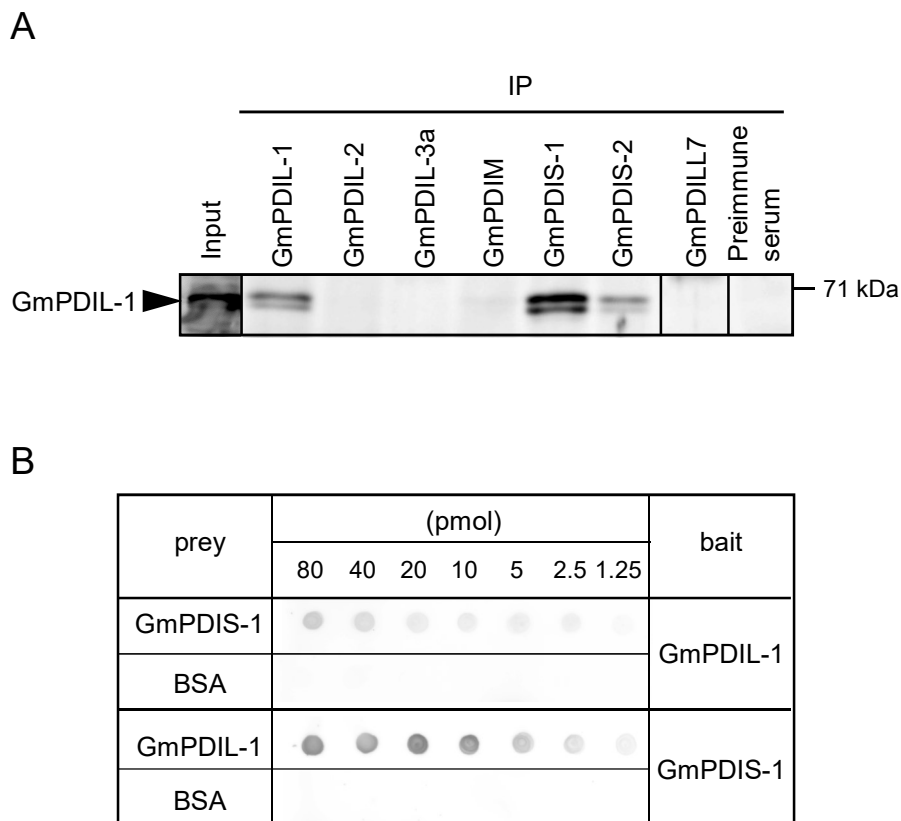

**Figure S3. GmPDIL-1 associates with GmPDIS-1 in the ER.** *A*, detection of PDI family protein complexes. Immunoprecipitation (IP). Soybean cotyledons ( were frozen in liquid nitrogen and homogenized using a Dounce homogenizer at 4° C in 20 mM HEPES buffer (pH 7.2) containing 150 mM NaCl, 1% digitonin, and 1% protease inhibitor cocktail (Sigma-Aldrich). The homogenate was placed on ice for 1 h and centrifuged for 30 min at 10,000 × g at 4° C. Immunoprecipitation was performed at 4° C for 1 h with pre-immune serum or antiserum specific to PDI family proteins (39, 44, 51, 52). Immunoprecipitants were collected using protein A-conjugated Sepharose beads (Sigma-Aldrich), washed with 20 mM HEPES buffer (pH 7.2) containing 150 mM NaCl, and subjected to Western blot analysis using antiserum specific to GmPDIL-1 as primary antibodies. The cotyledon extracts (input) and resulting immunoprecipitants were subjected to Western blot with anti-GmPDIL-1 serum. *B*, Dot far-Western blot analysis of the association of GmPDIL-1 with GmPDIS-1. Indicated amounts of GmPDIS-1, GmPDIL-1, or bovine serum albumin (BSA) as prey were dot-blotted and incubated with GmPDIL-1 or GmPDIS-1 as bait. Bound GmPDIL-1 or GmPDIS-1 was immuno-stained.

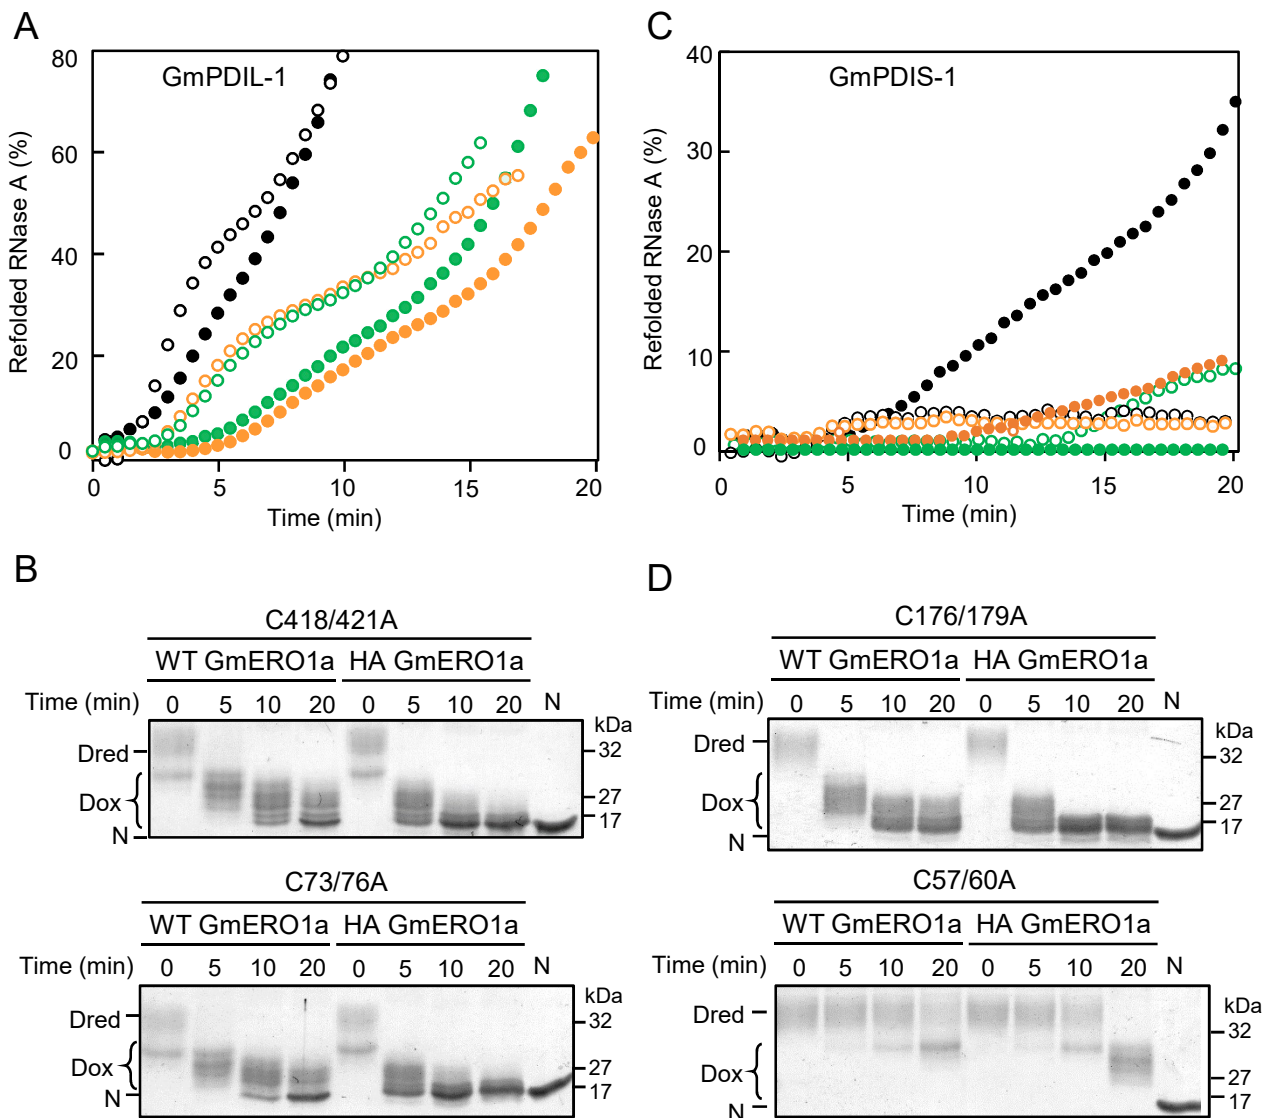

**Figure S4. Oxidative refolding of RNase A catalyzed by GmPDIL-1, GmPDIS-1, or respective active-center cysteine mutants in the presence of wild-type (WT) GmERO1a or C121/146A hyperactive (HA) mutant.** *A*, Reduced and denatured RNase A (8  $\mu$ M) was incubated with 3  $\mu$ M WT GmPDIL-1 (black), domain a' (C418/421A) (orange), or domain a (C73/76A) (green) active-center cysteine mutant in the presence of 1  $\mu$ M WT (solid symbols) or HA GmERO1a (open symbols) at 25 $^{\circ}$  C, after which the recovered RNase A activity was assayed. *B*, Formation of disulfide bonds in reduced and denatured RNase A during refolding catalyzed by the GmPDIL-1 C418/421A mutant (upper) or C73/76A mutant (bottom). Reactions were carried out as described in *A* above and quenched with 4'-acetamido-4'-maleimidylstilbene-2,2'-disulfonic acid. Proteins in the reaction mixture were analyzed by non-reducing SDS-PAGE. Dred, reduced and denatured RNase A; Dox, denatured RNase A with non-native disulfides; N, native RNase A. *C*, reduced and denatured RNase A was incubated with WT GmPDIS-1 (black) or domain a' active-center cysteine mutant (C176/179A) (orange) or domain a active-center cysteine mutant (C57/60A) (green) in the presence of WT (solid symbols) or HA GmERO1a (empty symbols) at 25 $^{\circ}$  C, after which the recovered RNase A activity was assayed. *D*, formation of disulfide bonds in reduced and denatured RNase A during refolding catalyzed by the GmPDIS-1 C176/179A (upper) or C57/60A (bottom) mutant.

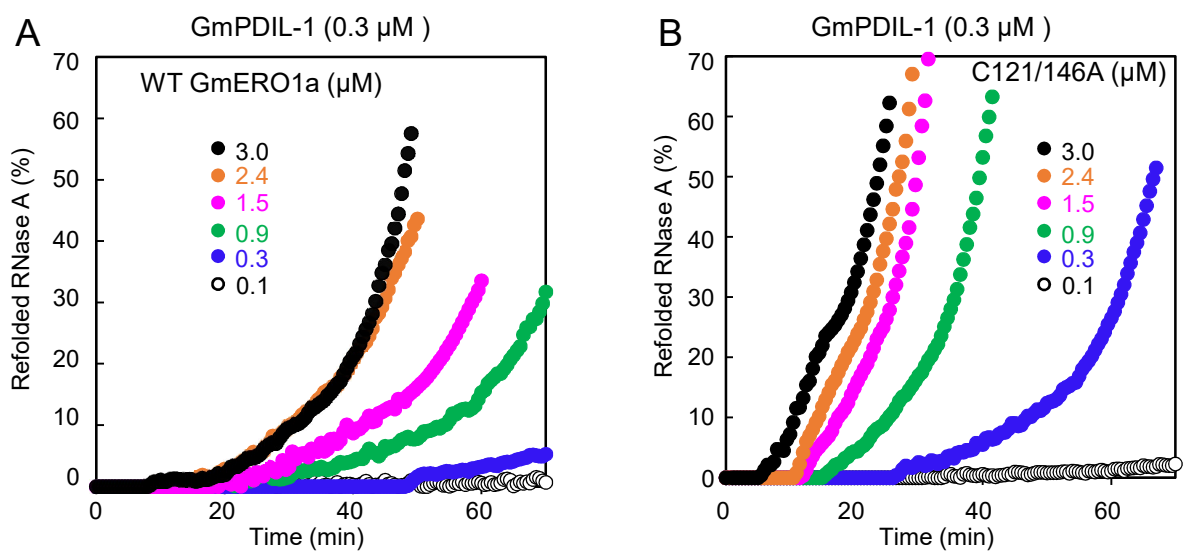

**Figure S5. Effect of the loss of regulation of GmERO1a activity on refolding of RNase A catalyzed by GmPDIL-1.** *A*, reduced and denatured RNase A (8  $\mu\text{M}$ ) was incubated with 0.3  $\mu\text{M}$  GmPDIL-1 in the presence of GmERO1a at the indicated concentrations at 25 $^{\circ}$  C, after which the recovered RNase A activity was assayed. *B*, reduced and denatured RNase A was incubated with GmPDIL-1 in the presence of the C121/146A hyperactive GmERO1a at the indicated concentrations, after which the recovered RNase A activity was assayed.

**Table S2**

List of primers and template plasmids for PCR of variant preparation.

| GmERO1a             |                                                                 |                                                              |                              |
|---------------------|-----------------------------------------------------------------|--------------------------------------------------------------|------------------------------|
| Variant             | Forward primer                                                  | Reverse primer                                               | Template plasmids            |
| C113A               | GGCCTGATGATGGCATGGCTCGGTTGCGGG                                  | CCCGCAACCGAGCCATGCCATCATCAGGCC                               | GmERO1a WT / pGEX6p-2        |
| C118A               | GGTTGCGGGACGCTAGTGTG                                            | CACACTAGCGTCCCGCAACC                                         | GmERO1a WT / pGEX6p-2        |
| C121A               | GGTTGCGGGACTGTAGTGTGGCTGAATGCCCTGAAAATGAATTCC                   | GGAATTCATTTTCAGGGCATTAGCCACACTACAGTCCCGCAACC                 | GmERO1a WT / pGEX6p-2        |
| C123A               | GGGACTGTAGTGTGTGAAGCCCCTGAAAATGAATTCCC                          | GGGAATTCATTTTCAGGGGCTTCACACACACTACAGTCCC                     | GmERO1a WT / pGEX6p-2        |
| C146A               | CGCCTTTCAATGACTGATCTTGTGGCCCAAGAAGGAAAACC                       | GGTTTTCCCTTCTGGGCAACAAGATCAGTCATTGAAAGGCG                    | GmERO1a WT / pGEX6p-2        |
| C113/146A           | CGCCTTTCAATGACTGATCTTGTGGCCCAAGAAGGAAAACC                       | GGTTTTCCCTTCTGGGCAACAAGATCAGTCATTGAAAGGCG                    | GmERO1a C113A / pGEX6p-2     |
| C121/146A           | CGCCTTTCAATGACTGATCTTGTGGCCCAAGAAGGAAAACC                       | GGTTTTCCCTTCTGGGCAACAAGATCAGTCATTGAAAGGCG                    | GmERO1a C121A / pGEX6p-2     |
| C123/146A           | GGGACTGTAGTGTGTGAAGCCCCTGAAAATGAATTCCC                          | GGGAATTCATTTTCAGGGGCTTCACACACACTACAGTCCC                     | GmERO1a C121/146A / pGEX6p-2 |
| C121/123/146A       | GGGACTGTAGTGTGGCTGAAGCCCCTGAAAATGAATTCCC                        | GGGAATTCATTTTCAGGGGCTTCAGCCACACTACAGTCCC                     | GmERO1a C123/146A / pGEX6p-2 |
| C118/121A           | GGTTGCGGGACGCTAGTGTG                                            | CACACTAGCGTCCCGCAACC                                         | GmERO1a C121A / pGEX6p-2     |
| GmPDIL-1            |                                                                 |                                                              |                              |
| Variant             | Forward primer                                                  | Reverse primer                                               | Template plasmids            |
| C73/76A             | CCATGGGCTGGCCACGCTAAGAAGCTTGCTCCCGAGTAT                         | CTTCTTAGCGTGGCCAGCCCATGGAGCGTAGAACTCGACGACGATGAAA            | GmPDIL-1 WT / pET46Ek/LIC    |
| C418/421A           | CCCTGGGCTGGTCATGCCAAACAGTTGGCTCCAATATTG                         | CTGTTTGGCATGACCAGCCCAGGGAGCATAAACTCCAGCAGAACATTC             | GmPDIL-1 WT / pET46Ek/LIC    |
| GmPDIS-1            |                                                                 |                                                              |                              |
| Variant             | Forward primer                                                  | Reverse primer                                               | Template plasmids            |
| WT(full)            | CGCGTACGAATTCCTCCGACGACGTCGTTGTG                                | CGCGCATCTCGAGCTCAAGCCGCATATGTC                               | GmPDIS-1 full / pET46Ek/LIC  |
| C57/60A             | TATGCTCCTTGGGCTGGACACGCCAAAAGCTTGCTCCAGAATATGAAAAG<br>CTTGGTAGC | GGAGCAAGCTTTTTGGCGTGTCCAGCCCAGGAGCATAGAACTCAACGAGAGCTC<br>C  | GmPDIS-1 full / pGEX6p-2     |
| C176/179A           | TATGCACCCTGGGCTGGACATGCCAAAAGCTTGCTCCTACTTACGAGAAA<br>GTTGCC    | GGAGCAAGACTTTTTGGCATGTCCAGCCCAGGGTGCATAAACTCAACCAAGACAT<br>C | GmPDIS-1 full / pGEX6p-2     |
| GmPDIS-2            |                                                                 |                                                              |                              |
| Variant             | Forward primer                                                  | Reverse primer                                               | Template plasmids            |
| WT(full)            | CGAATCGGATCCGACGACGTCGTTGCAC                                    | CGCGCATCTCGAGCTCAAGCAAAGATAGATAAG                            | GmPDIS-2 full / pET46Ek/LIC  |
| C56/59A             | TACGCTCCCTGGGCTGGACACGCCAAAAGGCTTGCCCCGGAGTACGAACA<br>GCTC      | GGCAAGCCTTTTGGCGTGTCCAGCCCAGGGAGCGTAAAACCTCAACGAGAGCGGC      | GmPDIS-2 full / pGEX6p-2     |
| C175/178A           | TATGCACCATGGGCTGGTCATGCCAAGGCCCTTGCCCCATTATGAAAAA<br>GTTGC      | GGCAAGGGCCTTGGCATGACCAGCCCATGGTGCATAGAATTCACCAGAACATC        | GmPDIS-2 full / pGEX6p-2     |
| <i>E. coli</i> Trx1 |                                                                 |                                                              |                              |
| Variant             | Forward primer                                                  | Reverse primer                                               | Template plasmids            |
| <i>E. coli</i> Trx1 | GACGACGACAAGATGAGCGATAAAATTATTCACC                              | GAGGAGAAGCCCAGTTACGCCAGTTAGCGTCGAG                           |                              |
